# Supplementary material for: Pulmonary Silicosis Alters MicroRNA Expression in Rat Lung and miR-411-3p Exerts Anti-fibrotic Effects by Inhibiting MRTF-A/SRF Signaling
Source: PubMed Central journal article supplement — Mol Ther Nucleic Acids. 2020 May 12;20:851–65. doi: 10.1016/j.omtn.2020.05.005 (PMC7256439; doi:10.1016/j.omtn.2020.05.005), 2020-05-12
Supplement: mmc1.pdf [file mmc1.pdf]

OMTN, Volume 20

## **Supplemental Information**

### **Pulmonary Silicosis Alters MicroRNA Expression in Rat Lung and miR-411-3p Exerts Anti-fibrotic Effects by Inhibiting MRTF-A/SRF Signaling**

**Xuemin Gao, Dingjie Xu, Shumin Li, Zhongqiu Wei, Shifeng Li, Wenchen Cai, Na Mao, Fuyu Jin, Yaqian Li, Xue Yi, Heliang Liu, Hong Xu, and Fang Yang**

**Table S1 The expression profile of differential miRNAs**

| NO. | miRNA name        | Control group<br>content | Silicosis group<br>content | log <sup>2</sup><br>(fold change) | P-value  |
|-----|-------------------|--------------------------|----------------------------|-----------------------------------|----------|
| 1   | rno-miR-292-5p    | 0                        | 11.2832                    | 10.14                             | 8.19E-12 |
| 2   | rno-miR-292-3p    | 0                        | 7.0492                     | 9.4613                            | 1.91E-10 |
| 3   | rno-miR-295-3p    | 0                        | 4.8306                     | 8.9161                            | 1.86E-07 |
| 4   | rno-miR-291a-3p   | 0                        | 3.0555                     | 8.2553                            | 4.51E-06 |
| 5   | rno-miR-155-3p    | 0                        | 2.1326                     | 7.7365                            | 2.35E-06 |
| 6   | rno-miR-881-3p    | 0                        | 2.1158                     | 7.7251                            | 0.013444 |
| 7   | rno-miR-135b-5p   | 0                        | 2.0126                     | 7.6529                            | 0.014651 |
| 8   | rno-miR-293-5p    | 0.3523                   | 50.9127                    | 7.1751                            | 1.32E-11 |
| 9   | rno-miR-188-5p    | 0                        | 1.3404                     | 7.0665                            | 7.90E-05 |
| 10  | rno-miR-743b-5p   | 0                        | 1.2385                     | 6.9525                            | 0.027306 |
| 11  | rno-miR-743a-3p   | 0                        | 1.1869                     | 6.8911                            | 0.029526 |
| 12  | rno-miR-743b-3p   | 0                        | 1.1611                     | 6.8593                            | 0.032019 |
| 13  | rno-miR-291b      | 0                        | 1.1205                     | 6.808                             | 0.008127 |
| 14  | rno-miR-466b-5p   | 0                        | 1.1102                     | 6.7947                            | 0.000167 |
| 15  | rno-miR-471-5p    | 0                        | 1.0837                     | 6.7598                            | 0.036316 |
| 16  | rno-miR-466b-3p   | 0                        | 0.9125                     | 6.5118                            | 0.008404 |
| 17  | rno-miR-212-3p    | 0.5432                   | 3.9932                     | 2.878                             | 0.00791  |
| 18  | rno-miR-466b-4-3p | 0.6435                   | 3.669                      | 2.5114                            | 0.010213 |
| 19  | rno-miR-466b-2-3p | 0.6435                   | 3.669                      | 2.5114                            | 0.010695 |
| 20  | rno-miR-212-5p    | 0.7567                   | 3.9403                     | 2.3805                            | 0.017963 |
| 21  | rno-miR-132-5p    | 1.0726                   | 5.2891                     | 2.3019                            | 7.98E-05 |
| 22  | rno-miR-146b-5p   | 4229.006                 | 20182.08                   | 2.2547                            | 9.47E-13 |
| 23  | rno-miR-21-5p     | 15450.34                 | 70581.41                   | 2.1916                            | 1.53E-16 |
| 24  | rno-miR-146b-3p   | 22.5817                  | 101.3028                   | 2.1654                            | 8.25E-10 |
| 25  | rno-miR-132-3p    | 9.2137                   | 40.5865                    | 2.1391                            | 7.93E-07 |
| 26  | rno-miR-21-3p     | 3.1898                   | 12.0515                    | 1.9177                            | 0.000108 |
| 27  | rno-miR-155-5p    | 33.3228                  | 124.4713                   | 1.9012                            | 4.45E-07 |
| 28  | rno-miR-653-5p    | 1.9307                   | 7.2058                     | 1.9                               | 0.000237 |
| 29  | rno-miR-206-3p    | 6.0933                   | 17.2657                    | 1.5026                            | 0.00096  |
| 30  | rno-miR-148a-3p   | 23546.11                 | 63418.52                   | 1.4294                            | 1.07E-05 |
| 31  | rno-miR-466c-5p   | 7.6952                   | 20.1652                    | 1.3898                            | 0.000576 |
| 32  | rno-miR-452-5p    | 13.0802                  | 32.1135                    | 1.2958                            | 0.000652 |
| 33  | rno-miR-183-5p    | 529.7892                 | 1239.862                   | 1.2267                            | 8.34E-05 |
| 34  | rno-miR-224-5p    | 200.458                  | 462.1928                   | 1.2052                            | 0.00026  |
| 35  | rno-miR-501-3p    | 3.9363                   | 8.8657                     | 1.1714                            | 0.004559 |
| 36  | rno-miR-96-5p     | 107.0636                 | 240.4405                   | 1.1672                            | 4.19E-05 |
| 37  | rno-miR-130b-5p   | 3.529                    | 7.7496                     | 1.1349                            | 0.020522 |
| 38  | rno-miR-146a-3p   | 5.1955                   | 11.1303                    | 1.0992                            | 0.010418 |
| 39  | rno-miR-182       | 428.3515                 | 905.7955                   | 1.0804                            | 0.000499 |
| 40  | rno-miR-148a-5p   | 105.0684                 | 211.9542                   | 1.0124                            | 0.000277 |
| 41  | rno-miR-18a-5p    | 2.984                    | 5.9862                     | 1.0044                            | 0.047177 |

---

|    |                 |          |          |         |          |
|----|-----------------|----------|----------|---------|----------|
| 42 | rno-miR-139-3p  | 10.6866  | 5.1788   | -1.0451 | 0.047487 |
| 43 | rno-miR-30a-5p  | 53536.88 | 25708.52 | -1.0583 | 0.000802 |
| 44 | rno-miR-99a-3p  | 5.4691   | 1.5003   | -1.8661 | 0.049114 |
| 45 | rno-miR-411-5p  | 13.514   | 3.2698   | -2.0472 | 4.17E-06 |
| 46 | rno-miR-379-5p  | 31.6637  | 7.5567   | -2.067  | 1.63E-07 |
| 47 | rno-miR-300-3p  | 4.5614   | 1.0699   | -2.092  | 0.027216 |
| 48 | rno-miR-127-3p  | 178.2171 | 41.3409  | -2.108  | 5.97E-09 |
| 49 | rno-miR-434-3p  | 5.6852   | 1.1114   | -2.3548 | 0.012532 |
| 50 | rno-miR-136-3p  | 6.2556   | 1.1888   | -2.3956 | 0.009609 |
| 51 | rno-miR-494-3p  | 3.1062   | 0.4386   | -2.8242 | 0.041879 |
| 52 | rno-miR-337-5p  | 3.2686   | 0.4128   | -2.9852 | 0.030617 |
| 53 | rno-miR-134-5p  | 9.8534   | 1.0837   | -3.1847 | 0.006719 |
| 54 | rno-miR-382-5p  | 2.7582   | 0.2838   | -3.2808 | 0.016499 |
| 55 | rno-miR-541-5p  | 7.6002   | 0.4386   | -4.1151 | 0.000103 |
| 56 | rno-miR-6318    | 0.476    | 0        | -5.5729 | 0.040156 |
| 57 | rno-miR-376c-3p | 0.6206   | 0        | -5.9556 | 0.029422 |
| 58 | rno-miR-369-3p  | 0.6657   | 0        | -6.0568 | 0.024472 |
| 59 | rno-miR-379-3p  | 0.6862   | 0        | -6.1006 | 0.021997 |
| 60 | rno-miR-129-5p  | 0.7806   | 0        | -6.2865 | 0.001175 |
| 61 | rno-miR-124-3p  | 0.7878   | 0        | -6.2998 | 0.017929 |
| 62 | rno-miR-431     | 0.8276   | 0        | -6.3709 | 0.000868 |
| 63 | rno-miR-873-3p  | 0.9494   | 0        | -6.5689 | 0.000483 |
| 64 | rno-miR-325-3p  | 0.9519   | 0        | -6.5727 | 0.01378  |
| 65 | rno-miR-137-3p  | 1.0415   | 0        | -6.7025 | 0.000338 |
| 66 | rno-miR-1193-3p | 1.0433   | 0        | -6.705  | 0.000301 |
| 67 | rno-miR-433-3p  | 1.1145   | 0        | -6.8003 | 0.000205 |
| 68 | rno-miR-409a-5p | 1.3919   | 0        | -7.1209 | 9.55E-05 |
| 69 | rno-miR-370-3p  | 2.5195   | 0        | -7.977  | 1.17E-06 |
| 70 | rno-miR-411-3p  | 2.547    | 0        | -7.9927 | 9.76E-07 |

---

**Table S2 The sequences of miRNAs and siRNAs**

| Mimic/inhibitor            | Sense: (5'-3')          | Antisense: (5'-3')       |
|----------------------------|-------------------------|--------------------------|
| mimic Negative Control     | UUUGUACUACACAAAAGUACUG  | CAGUACUUUUGUGUAGUACAAA   |
| rno-miR-1193-3p mimic      | UAGGUCACCCGUUUUACUAUCC  | GGAUAGUAAAACGGGUGACCUA   |
| rno-miR-155-3p mimic       | CUCCUACCUGUUAGCAUUAAC   | GUUAAUGCUAACAGGUAGGAG    |
| rno-miR-291a-3p mimic      | AAAGUGCUUCCACUUUGUGUGCC | GGCACACAAAGUGGAAGCACUUU  |
| rno-miR-292-3p mimic       | AAGUGCCGCCAGGUUUUGAGUGU | ACACUCAAAACCUGGCGGCACUU  |
| rno-miR-292-5p mimic       | ACUCAAACUGGGGGCUCUUUUG  | CAAAAGAGCCCCCAGUUUGAGU   |
| rno-miR-295-3p mimic       | AAGUGCUACUACUUUUGGGUGU  | ACACCCAAAAGUAGUAGCACUU   |
| rno-miR-370-3p mimic       | GCCUGCUGGGGUGGAACCUGGU  | ACCAGGUUCCACCCCAGCAGGC   |
| rno-miR-409a-5p mimic      | AGGUUACCCGAGCAACUUUGCAU | AUGCAAAGUUGCUCGGGUAACCU  |
| rno-miR-411-3p mimic       | UAUGUAACACGGUCCACUAA    | UUAGUGGACCGUGUUACAUA     |
| rno-miR-433-3p mimic       | AUCAUGAUGGGCUCUCGGUGU   | ACACCGAGGAGCCCAUCAUGAU   |
| inhibitor Negative Control | CAGUACUUUUGUGUAGUACAAA  | -                        |
| rno-miR-1193-3p inhibitor  | GGAUAGUAAAACGGGUGACCUA  | -                        |
| rno-miR-155-3p inhibitor   | GUUAAUGCUAACAGGUAGGAG   | -                        |
| rno-miR-291a-3p inhibitor  | GGCACACAAAGUGGAAGCACUUU | -                        |
| rno-miR-292-3p inhibitor   | ACACUCAAAACCUGGCGGCACUU | -                        |
| rno-miR-292-5p inhibitor   | CAAAAGAGCCCCCAGUUUGAGU  | -                        |
| rno-miR-295-3p inhibitor   | ACACCCAAAAGUAGUAGCACUU  | -                        |
| rno-miR-370-3p inhibitor   | ACCAGGUUCCACCCCAGCAGGC  | -                        |
| rno-miR-409a-5p inhibitor  | AUGCAAAGUUGCUCGGGUAACCU | -                        |
| rno-miR-411-3p inhibitor   | UUAGUGGACCGUGUUACAUA    | -                        |
| rno-miR-433-3p inhibitor   | ACACCGAGGAGCCCAUCAUGAU  | -                        |
| mmu-miR-411-3P agomir      | UAUGUAACACGGUCCACUAACC  | GGUUAGUGGACCGUGUUACAUA   |
| agomir Negative Control    | UUUGUACUACACAAAAGUACUG  | CAGUACUUUUGUGUAGUACAAA   |
| siRNA-Negative Control     | UUCUCCGAACGUGUCACGUdTdT | ACGUGACACGUUCGGAGAAdTdT  |
| siRNA <i>Mrtfa</i> _001    | CCACACUCAUCAAGCAAAGdTdT | CUUUGCUUGAUGAGUGUGGdTdT  |
| siRNA <i>Mrtfa</i> _002    | UAGUGCCACCUCCAUAUCAdTdT | UGAUUAUGGAGGUGGCACUAdTdT |
| siRNA <i>Mrtfa</i> _003    | CACUACAGAUCGUGAAGGAdTdT | UCCUUCACGAUCUGUAGUGdTdT  |

**Table S3 The primers of miRNAs**

| NO.           | primer                                      |
|---------------|---------------------------------------------|
| miR8002818    | Bulge-loopTM rno-miR-292-5P RT primer       |
| miR8002820    | Bulge-loopTM rno-miR-292-3P RT primer       |
| miR8000181    | Bulge-loopTM rno-miR-291a-3P RT primer      |
| ssD115584401  | Bulge-loopTM rno-miR-155-3P RT primer       |
| miR8002822    | Bulge-loopTM rno-miR-295-3P RT primer       |
| miR8000175    | Bulge-loopTM rno-miR-1193-3P RT primer      |
| miR8002824    | Bulge-loopTM rno-miR-411-3P RT primer       |
| ssD809230338  | Bulge-loopTM rno-miR-370-3P RT primer       |
| ssD809230358  | Bulge-loopTM rno-miR-409a-5P RT primer      |
| ssD809230371  | Bulge-loopTM rno-miR-433-3P RT primer       |
| ssD0904071008 | Bulge-loopTM U6 RT primer                   |
| miR8002819    | Bulge-loopTM rno-miR-292-5P Forward primer  |
| miR8002821    | Bulge-loopTM rno-miR-292-3P Forward primer  |
| miR8000182    | Bulge-loopTM rno-miR-291a-3P Forward primer |
| ssD115584402  | Bulge-loopTM rno-miR-155-3P Forward primer  |
| miR8002823    | Bulge-loopTM rno-miR-295-3P Forward primer  |
| miR8000176    | Bulge-loopTM rno-miR-1193-3P Forward primer |
| miR8002825    | Bulge-loopTM rno-miR-411-3P Forward primer  |
| ssD809231030  | Bulge-loopTM rno-miR-370-3P Forward primer  |
| ssD809231050  | Bulge-loopTM rno-miR-409a-5P Forward primer |
| ssD809231063  | Bulge-loopTM rno-miR-433-3P Forward primer  |
| ssD089261711  | Bulge-loopTM miR-Reverse primer             |
| ssD0904071006 | Bulge-loopTM U6 Forward primer              |
| ssD0904071107 | Bulge-loopTM U6 Reverse primer              |

**Table S4 The primer sequences of genes**

| Gene           | Species | Primer sequence(5'-3')          |
|----------------|---------|---------------------------------|
| <i>Col 1a1</i> | Mouse   | Forward: GCTCCTCTTAGGGGCCACT    |
|                |         | Reverse: CCACGTCTCACCATTGGGG    |
| <i>Acta2</i>   | Mouse   | Forward: GACGTACAACCTGGTATTGTG  |
|                |         | Reverse: TCAGGATCTTCATGAGGTAG   |
| <i>Srf</i>     | Mouse   | Forward: GGCCGCGTGAAGATCAAGAT   |
|                |         | Reverse: CACATGGCCTGTCTCACTGG   |
| <i>Mrtfa</i>   | Mouse   | Forward: GGCCAGGACCGAGGACTATT   |
|                |         | Reverse: CCACAATGATAGCCTCCTTCAG |
| <i>Gapdh</i>   | Mouse   | Forward: CCTGCACCACCAACTGCTTA   |
|                |         | Reverse: GCCCCACGGCCATCACGCCA   |
| <i>Col 1a1</i> | Rat     | Forward: ACCTCAGGGTATTGCTGGAC   |
|                |         | Reverse: GACCAGGGAAGCCTCTTTCT   |
| <i>Acta2</i>   | Rat     | Forward: CAATGGCTCCGGGCTCTGTA   |
|                |         | Reverse: CTCTTGCTCTGCGCTTCGTC   |
| <i>Srf</i>     | Rat     | Forward: GTGGGGAAACCAAGGACACA   |
|                |         | Reverse: GTTGGTGATGGGGAAGGAGG   |
| <i>Mrtfa</i>   | Rat     | Forward: CGAACGAGGCGGTTACCATCA  |
|                |         | Reverse: CGGTTCTCATCATTTTCGCC   |
| <i>Gapdh</i>   | Rat     | Forward: GGTGAAGGTCGGTGTGAACG   |
|                |         | Reverse: CTCGCTCCTGGAAGATGGTG   |

**Table S5 The respiratory parameters of lung function measured by FinePointe WBP**

| Respiratory parameters |                                                                                                                                                              | Unit   |
|------------------------|--------------------------------------------------------------------------------------------------------------------------------------------------------------|--------|
| <b>f</b>               | Respiratory Rate                                                                                                                                             | BPM    |
| <b>TVb</b>             | Tidal volume (volume inhaled) estimated from the Box Flow signal. It is equal to the product of the volume measured from the Box Flow and Comp               | mL     |
| <b>MVb</b>             | Minute volume (the rate of ventilation) estimated from the Box Flow signal. It is equal to the product of the volume measured from the Box Flow, f, and Comp | mL/min |
| <b>Penh</b>            | Index of constriction.                                                                                                                                       | None   |
| <b>PAU</b>             | Index of constriction.                                                                                                                                       | None   |
| <b>Rpef</b>            | The location into expiration where the peak occurs as a fraction of Te                                                                                       | None   |
| <b>Comp</b>            | The factor applied to box flow to estimate animal's flow                                                                                                     | None   |
| <b>PIFb</b>            | Estimated peak inspiratory flow                                                                                                                              | mL/s   |
| <b>PEFb</b>            | Estimated peak expiratory flow                                                                                                                               | mL/s   |
| <b>Ti</b>              | Inspiratory time                                                                                                                                             | S      |
| <b>Te</b>              | Expiratory time                                                                                                                                              | S      |
| <b>EF50</b>            | Expiratory flow at 50% expired volume (Uncompensated)                                                                                                        | mL/s   |
| <b>EIP</b>             | End inspiratory pause. Time it takes to transition from inspiration to expiration                                                                            | ms     |
| <b>EEP</b>             | End expiratory pause. Time it takes to transition from expiration to inspiration                                                                             | ms     |
| <b>Tr</b>              | Relaxation time.                                                                                                                                             | S      |
| <b>TB</b>              | Duration of breaking. Percentage of the breath occupied by transitioning from inspiration to expiration                                                      | %      |
| <b>TP</b>              | Duration of pause before inspiration. Percentage of the breath occupied by transition from expiration to inspiration                                         | %      |
| <b>Tbody</b>           | Body temperature. Either assumed or measured using telemetry                                                                                                 | C      |
| <b>Tc</b>              | Chamber temperature. Either assumed or measured using digital temperature sensor in the chamber                                                              | C      |
| <b>RH</b>              | Relative humidity. Either assumed or measured using digital humidity sensor in the chamber                                                                   | %      |
| <b>Rinx</b>            | Rejection index. Percentage of breaths rejected before a breath is accepted.                                                                                 | %      |
